# Supplementary material
Source: PubMed Central journal article supplement (PMC3306712)
Supplement: 1201990109_pnas.201201990SI.pdf [file 1201990109_pnas.201201990SI.pdf]

# Supporting Information

de Waal et al. 10.1073/pnas.1201990109

## SI Methods

**DNA Isolation.** DNA was isolated from the interphase/organic phase that remained after RNA isolation with TRIzol (Invitrogen). To facilitate the transfer of DNA into the aqueous phase, 0.5 mL of Back Extraction Buffer (4 M guanidine thiocyanate, 50 mM sodium citrate, and 1 M Tris) was added and samples were inverted several times. Samples were then spun at 12,000 relative centrifugal force (rcf) for 30 min at room temperature, the aqueous phase was transferred to a new tube, and DNA was precipitated by using isopropyl alcohol. After centrifugation at 12,000 rcf for 15 min at 4 °C, the supernatant was completely removed and the DNA pellet was washed in 75% ethanol and spun again at 12,000 rcf for 10 min at 4 °C. The supernatant was removed, and the samples were allowed to air dry for 10 min before being dissolved in 0.1× TE buffer.

**Bisulfite Pyrosequencing.** To further assess DNA methylation profiles of the *H19* and *Snrpn* DMRs, we used next-generation sequencing technology and performed custom pyrosequencing assays on the last six CpG sites for the *H19* DMR and seven CpG sites for the *Snrpn* DMR of the region previously analyzed by allele-specific bisulfite sequencing. In brief, 50 ng of bisulfite-treated DNA was amplified with the PyroMark PCR kit (Qiagen) by using the manufacturer's protocol in a 25- $\mu$ L reaction. For the *H19* DMR, the primer sequences were as follows: for-

ward primer 5'-GGGTAGGATATATGTATTTTTTAGGTTG-3', biotinylated reverse primer 5'-CTCATAAAACCCATAAC-TATAAAATCAT-3'. For the *Snrpn* DMR, the primer sequences were as follows: forward primer 5'-GGTAGTTGTT-TTTGGTAGGATAT-3', biotinylated reverse primer 5'-ACTAAAATCCACAAACCCAACTAACCT-3'. The reaction conditions were as follows: an initial denaturation step at 95 °C for 15 min, followed by 45 cycles at 95 °C for 30 s, 53 °C for 30 s, and 72 °C for 15 s, then a final extension and annealing step at 72 °C for 10 min. The biotinylated primer was used to facilitate isolation of single-stranded DNA templates by using streptavidin-Sepharose beads (Amersham) according to manufacturer's instructions. Ten microliters of the biotinylated PCR product was used for pyrosequencing with either the *H19* DMR sequencing primer, 5'-TGTAAGATTAGGGTTGT-3', or the *Snrpn* DMR sequencing primer, 5'-GTGTAGTTATTGTTTGGGA-3'. Pyrosequencing was performed with the PyroMark Q96MD (Qiagen) system and the PyroMark Gold 96 reagents kit (Qiagen). The degree of methylation at each CpG site was quantified with Pyro Q-CpG software (Biotage) and determined by dividing the incorporation of cytosine by incorporation of cytosine plus thymine (%C = C/C+T) at each site. The percent methylation was calculated by averaging the degree of methylation at each of the CpG sites analyzed.



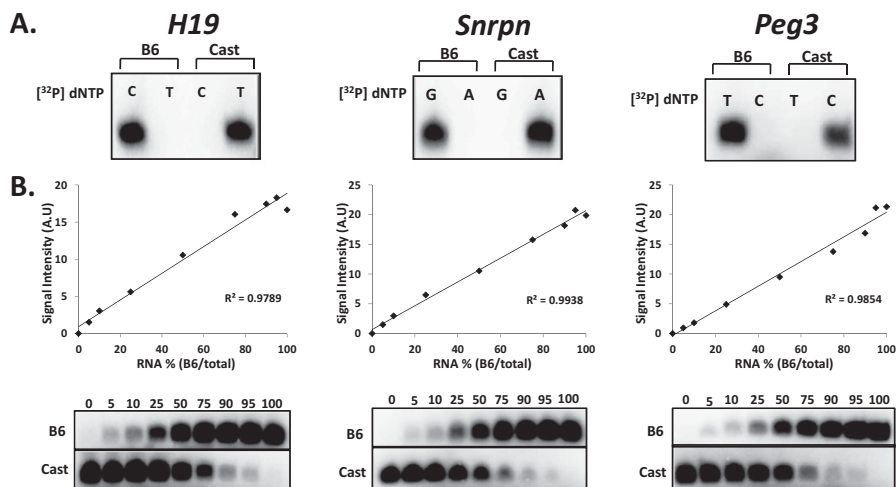

**Fig. 53.** Single nucleotide primer extension (SNUPE) assay for allele-specific expression of imprinted genes. RNA from C57BL/6 and B6(CAST7) mice was isolated from muscle for *H19* and brain for *Snrpn* and *Peg3*. RT-PCR was performed, and the amplified PCR products were gel-purified. The amplified DNA was then subjected to a primer extension reaction by using a primer that lies just 5' to a SNP with [<sup>32</sup>P] dNTPs that were specific to B6 and Cast alleles. (A) The SNUPE assay for *H19*, *Snrpn*, and *Peg3* showed allele-specific incorporation, whereas nonspecific incorporation was not detected. (B) Quantitative assessment of SNUPE assays. Different ratios of B6 or Cast RNA from muscle (*H19*) and brain (*Snrpn* and *Peg3*) were used to determine sensitivity and quantitation for each SNUPE assay. Each band was quantified by using data analysis software, and the signal intensity for 0% RNA was set to 0 and subtracted from all other values for background correction. The values obtained demonstrate that all three assays are relatively linear ( $R^2 > 0.97$  for all three genes). B6, C57BL/6 mouse; Cast, B6 (CAST7) mouse.

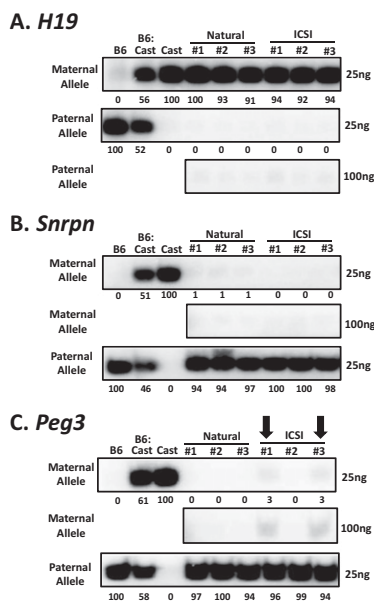

**Fig. 54.** Allele-specific expression of imprinted genes in the somatic tissues of naturally conceived and ICSI-derived female mice. (A) The SNUPE assay for *H19* was performed on RNA isolated from muscle tissue of natural and ICSI male mice. (B) The SNUPE assay for *Snrpn* was performed on RNA isolated from brain tissue of natural and ICSI female mice. (C) The SNUPE assay for *Peg3* was performed on RNA isolated from brain tissue of natural and ICSI female mice. The numbers below each lane indicate the percentage of expression compared with the internal controls. The amount of purified PCR product loaded onto the gel is indicated to the right of each gel. B6, 100% C57BL/6 RNA; Cast, 100% B6(CAST7) RNA; B6:Cast, 50% B6 RNA and 50% Cast RNA. Black arrows point to aberrant allele-specific gene expression patterns that constitute epimutations in ICSI-derived mice. Other details are as described in Fig. 2.

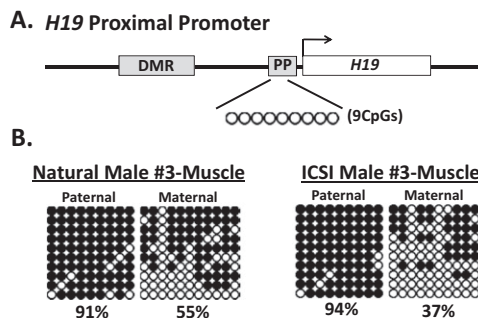

**Fig. S5.** Allele-specific DNA methylation of the *H19* proximal promoter in muscle tissue of naturally conceived and ICSI-derived male mice. (A) Schematic representation of the region analyzed by allele-specific bisulfite sequencing. The *H19* proximal promoter (PP) is a somatic DMR that is located in the promoter of the *H19* gene. The paternal (B6) allele has 9 CpG sites and the maternal (Cast) allele has 11 CpG sites. (B) Methylation profile of the *H19* PP in muscle tissue from naturally conceived male mouse no. 3 and ICSI-derived male mouse no. 3. Other details are as described in Fig. 1.

### A. *H19* and *Peg3*

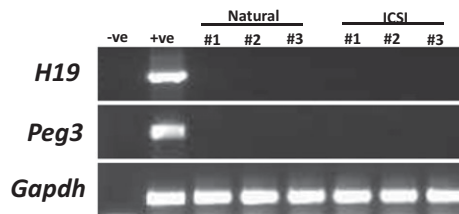

### B. *Snrpn*

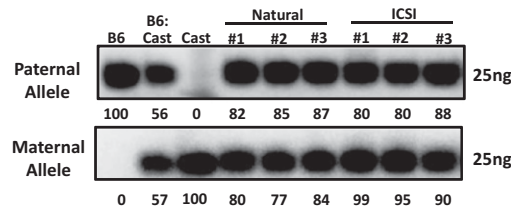

**Fig. S6.** Expression analysis of imprinted genes in advanced germ cells of naturally conceived and ICSI-derived male mice. (A) RT-PCR for *H19* and *Gapdh* was performed on RNA isolated from purified germ cells of natural and ICSI male mice. (B) The SNUPE assay for *Snrpn* was performed on RNA isolated from purified germ cells of natural and ICSI male mice. The numbers below each lane indicate the percentage of expression compared with the internal controls. The amount of purified PCR product loaded onto the gel is indicated to the right of each gel. -ve, no template; +ve, RNA from natural muscle tissue for *H19* and RNA from natural brain tissue for *Peg3* and *Gapdh*.

**Table S1. Regions analyzed, primer sequences and PCR conditions for bisulfite assay**

| Gene             | Accession | Position  | Primer Type | Primer Sequence (5'-3')        | Annealing temperature | Reference             |
|------------------|-----------|-----------|-------------|--------------------------------|-----------------------|-----------------------|
| <i>H19</i> DMR   | U19619    | 1304-1726 | OF          | GAGTATTTAGGAGGTATAAGAATT       | 50°C                  | Trembaly et al., 1997 |
|                  |           |           | OR          | ATCAAAAACATAACATAAACCCTCT      |                       |                       |
|                  |           |           | IF          | GTAAGGAGATTATGTTTATTTTTGG      | 55°C                  |                       |
|                  |           |           | IR          | CCTCATTAAATCCCATAACTAT         |                       |                       |
| <i>H19</i> PP    | U19619    | 4396-4780 | OF          | GTTGAGGATTTGTTAAGGTGTTATTGT    | 50°C                  |                       |
|                  |           |           | OR          | AATAATAACTAATTTAAACACTCCTCACC  |                       |                       |
|                  |           |           | IF          | GAGTGGTTATGATTGGTTAGTTTTGAG    | 52°C                  |                       |
|                  |           |           | IR          | AATAATAACTAATTTAAACACTCCTCACC  |                       |                       |
| <i>Snrpn</i> DMR | AF081460  | 2151-2570 | OF          | TATGTAATATGATATAGTTTAGAAATTAG  | 55°C                  | Lucifero et al., 2002 |
|                  |           |           | OR          | AATAAACCCAAATCTAAAATATTTTAAATC |                       |                       |
|                  |           |           | IF          | AATTTGTGTGATGTTTGAATTATTTGG    | 60°C                  |                       |
|                  |           |           | IR          | ATAAAATACACTTTCACTACTAAAATCC   |                       |                       |
| <i>Peg3</i> DMR  | AF105262  | 2781-3384 | OF          | TTTTGATAAGGAGGTGTTT            | 50°C                  | Lucifero et al., 2004 |
|                  |           |           | OR          | ACTCTAATATCCACTATAATAA         |                       |                       |
|                  |           |           | IF          | AGTGTGGGTGATTAGATT             | 50°C                  |                       |
|                  |           |           | IR          | TAACAAAACCTCTACATCATC          |                       |                       |

OF, outside forward; OR, outside reverse; IF, inside forward; IR, inside reverse; DMR, differentially methylated region; PP proximal promoter
